# Supplementary material for: Five low energy phosphorene allotropes constructed through gene segments recombination
Source: PubMed Central journal article supplement (PMC5406830; doi:10.1038/srep46431), 2017-04-27
Supplement: srep46431-s1.pdf [file srep46431-s1.pdf]

Supplementary for “Five low energy phosphorene allotropes constructed through gene segments recombination”

Chaoyu He\*, ChunXiao Zhang, Chao Tang\*, Tao Ouyang, Jin Li and Jianxin Zhong

Hunan Key Laboratory for Micro-Nano Energy Materials and Devices, Xiangtan University, Hunan

411105, P. R. China;

School of Physics and Optoelectronics, Xiangtan University, Xiangtan 411105, China.

Here we provide a supplementary file including 1) perspective crystalline views of  $\eta$ -P,  $\theta$ -P, G1, G2, G3, B1 and B2 from different directions, 2) testing results based on allotrope G1 and black  $\alpha$ -P for cutoff energy and K-mesh, 3) crystal structures, relative energies, and band structures of phosphorene allotropes in categories 4-7, 3-12, 4-8, 5-8 and 5-7, 4) phonon band structures and density of states for allotropes G1, G2, G3, B1 and B2, 5) electronic band structures of allotropes  $\eta$ -P,  $\theta$ -P, G2, G3, B1 and B2, 6) as well as lattice constants and atomic positions for G1, G2, G3, B1 and B2 in format of VASP-POSCAR.

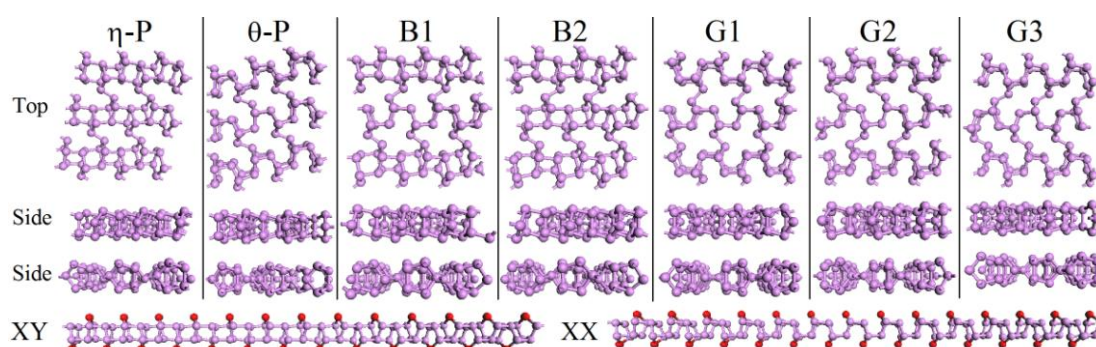

**Fig. S1.** Perspective top and side views of allotrope  $\eta$ -P,  $\theta$ -P, B1, B2, G1, G2 and G3 and the corresponding XY and XX gene segments are shown.

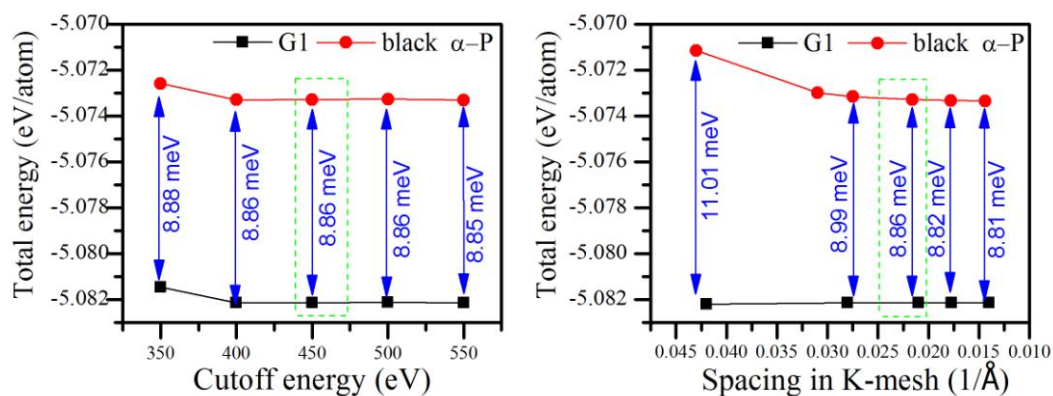

**Fig. S2.** Testing results based on allotrope G1 and black  $\alpha$ -P: dependence of total energy on cutoff energy (left) and on sample K-mesh (right).

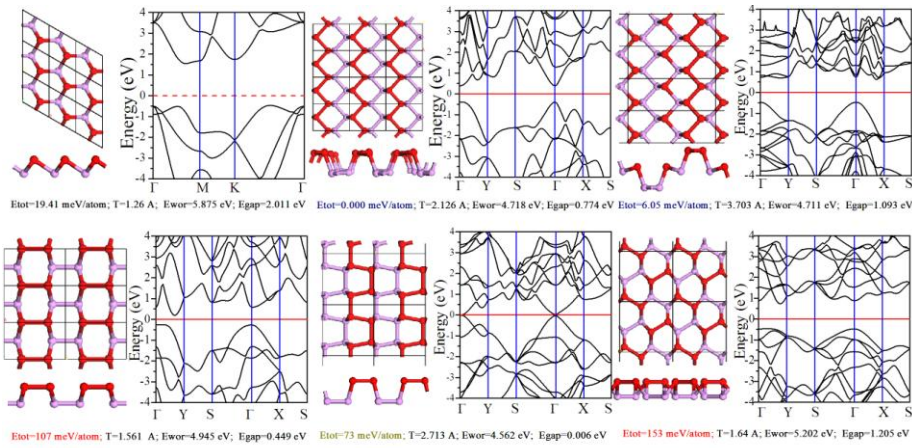

**Fig. S3** The optimized crystal structures, relative energies (respect to  $\alpha$ -P, meV/atom), band structures and band gaps of single-layered 6-6 phosphorene allotropes based on DFT-calculation.

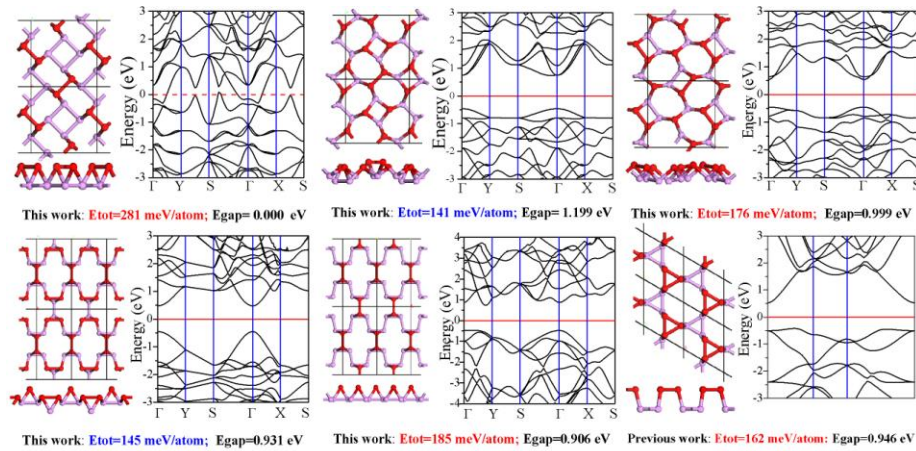

**Fig. S4** The optimized crystal structures, relative energies (respect to  $\alpha$ -P, meV/atom), band structures and band gaps of single-layered 4-7 (top 3) and 3-12 (bottom 3) phosphorene allotropes based on DFT-calculation.

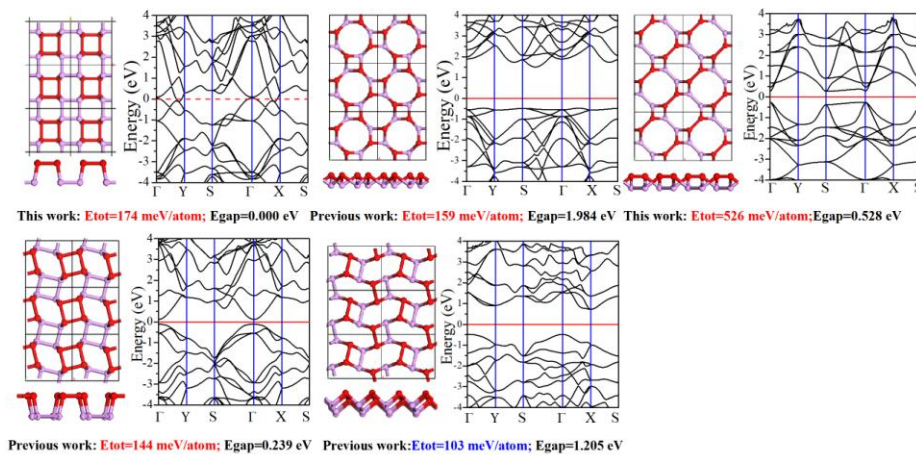

**Fig. S5** The optimized crystal structures, relative energies (respect to  $\alpha$ -P, meV/atom), band structures and band gaps of single-layered 4-8 phosphorene allotropes based on DFT-calculation.



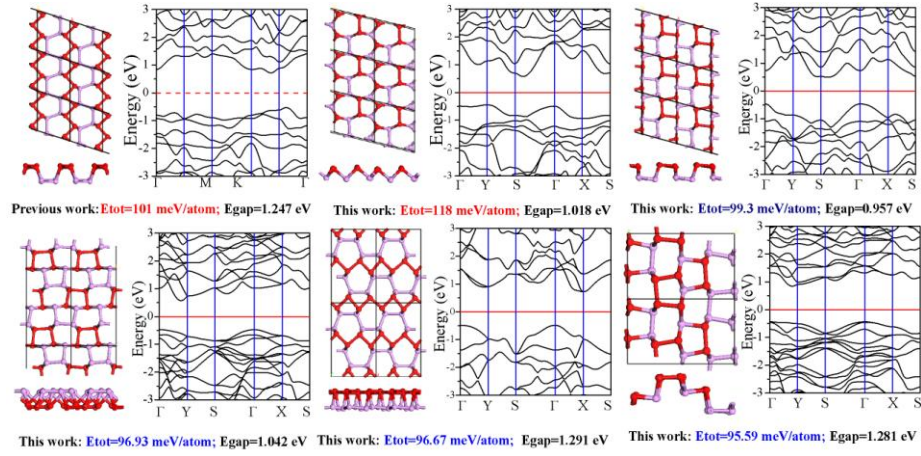

**Fig. S6** The optimized crystal structures, relative energies (respect to  $\alpha$ -P, meV/atom), band structures and band gaps of single-layered 5-7 phosphorene allotropes based on DFT-calculation.

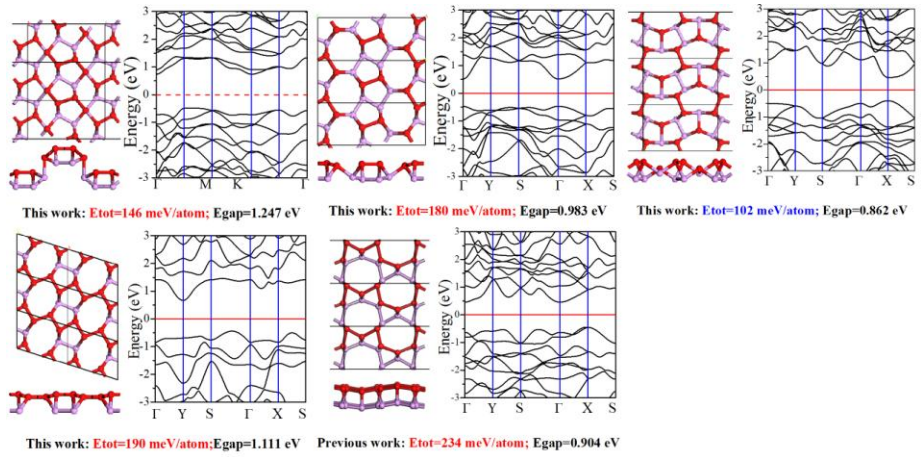

**Fig. S7** The optimized crystal structures, relative energies (respect to  $\alpha$ -P, meV/atom), band structures and band gaps of single-layered 5-8 phosphorene allotropes based on DFT-calculation.

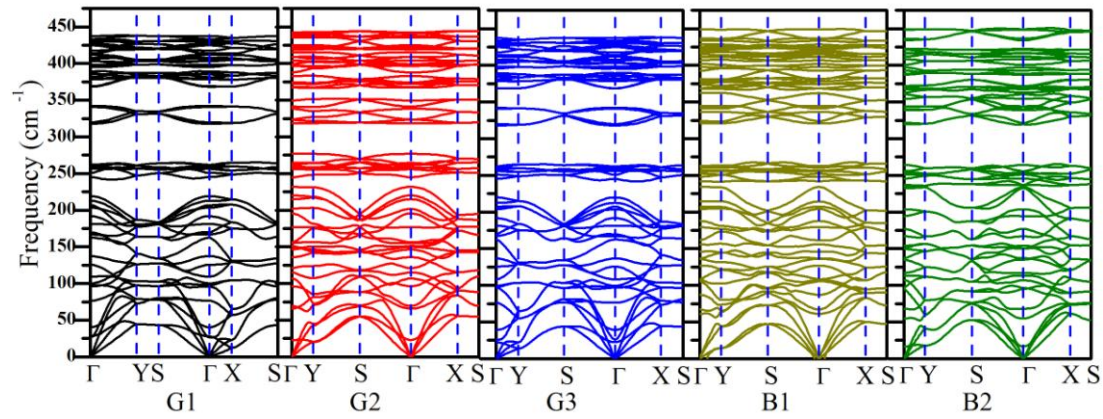

**Fig. S8.** Simulated phonon band structures of the five new phosphorene allotropes **G1**, **G2**, **G3**, **B1** and **B2** based on DFT-calculation.

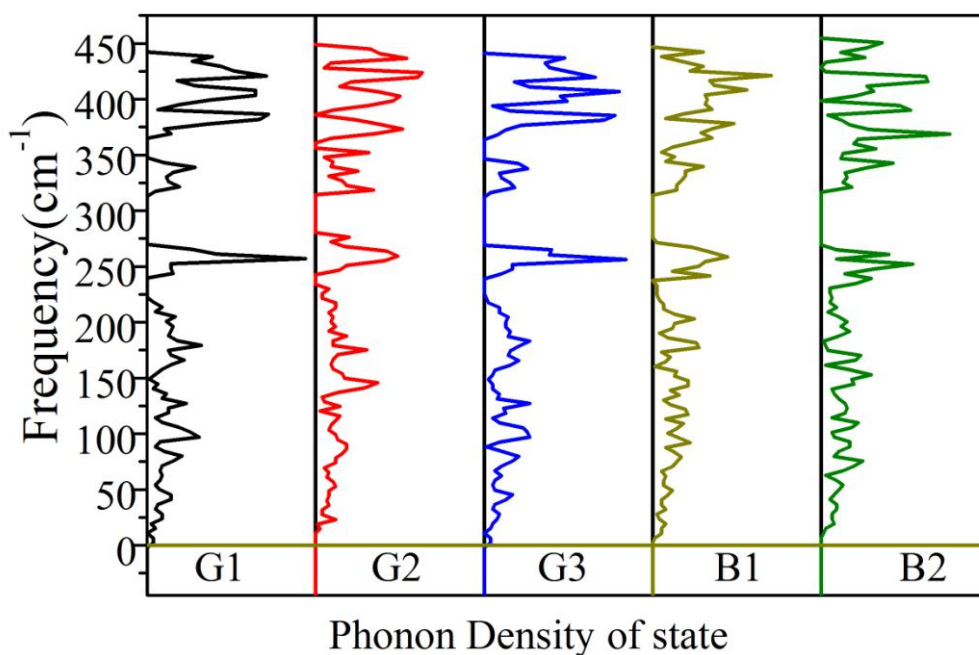

**Fig.S9.** Phonon density of states of allotropes **G1**, **G2**, **G3**, **B1** and **B2**.

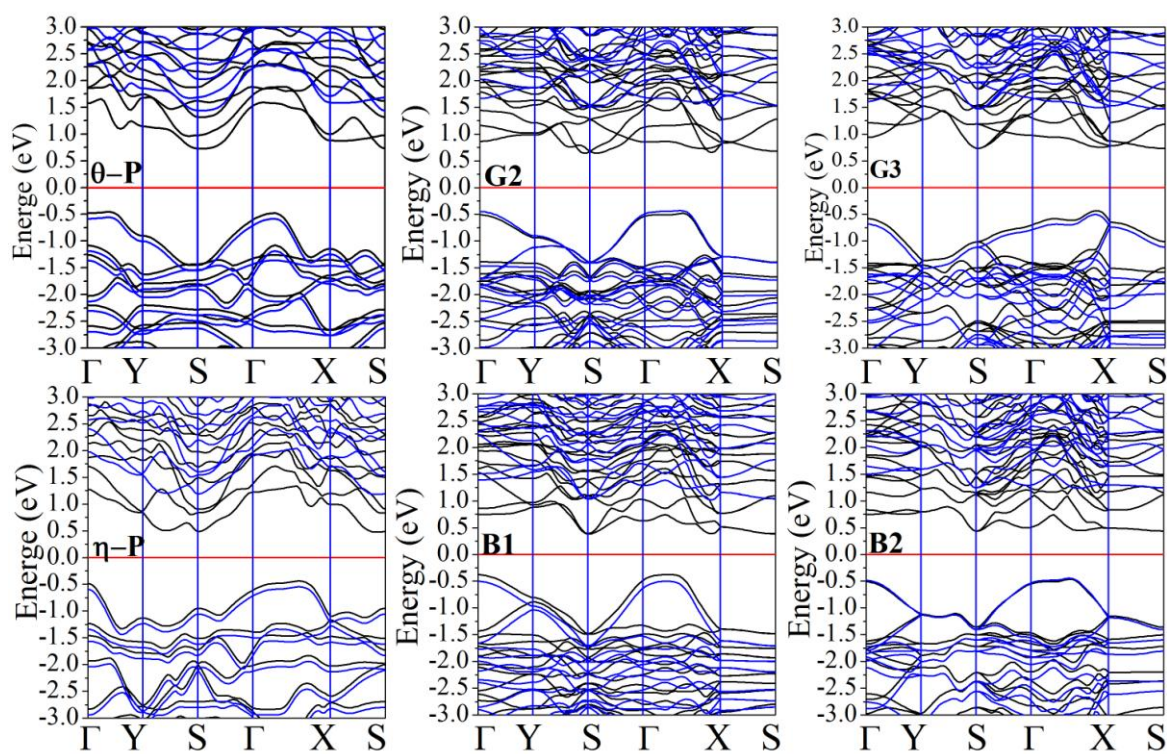

**Fig. S10.** Electronic band structures of allotropes  $\eta$ -P,  $\theta$ -P, G2, G3, B1 and B2, black solid lines are calculated form DFT method, blue solid lines are calculated form HSE06 method.



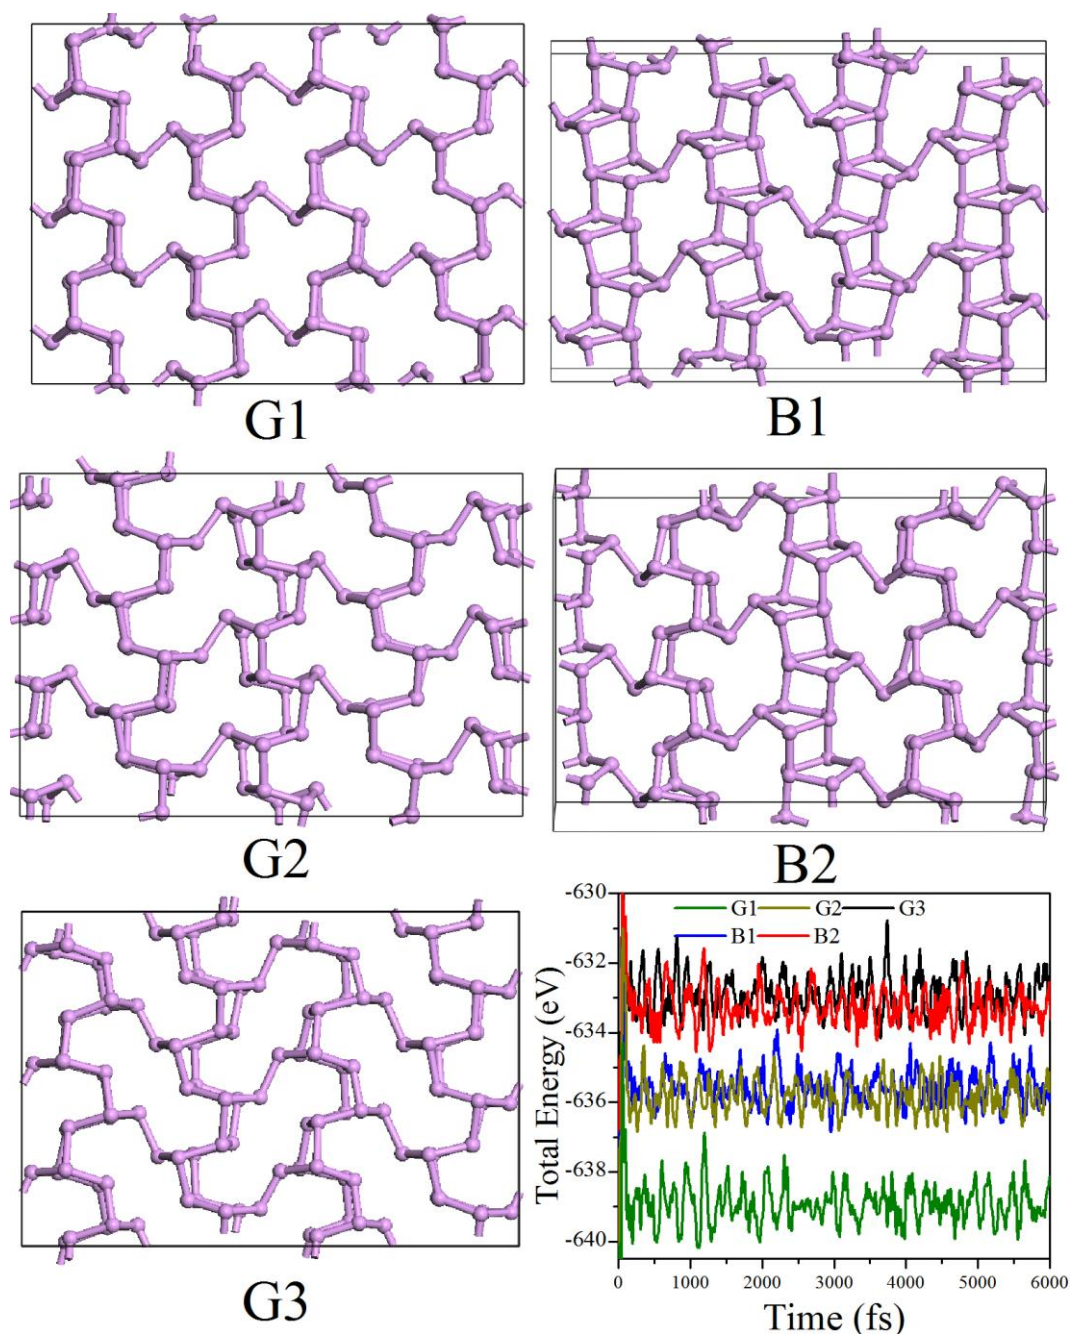

**Fig. S11.** Snapshot of the equilibrium structures at 300 K for bi-layered G1, G2, G3, B1 and B2 at the end of 6 ps of BOMD simulation. The BOMD simulation is performed in the canonical ensemble with the temperature being controlled at 300 K using the Nosè algorithm, with the time step of 2fs. The fluctuations of potential energy of the five new allotropes in the process of BOMD simulation.

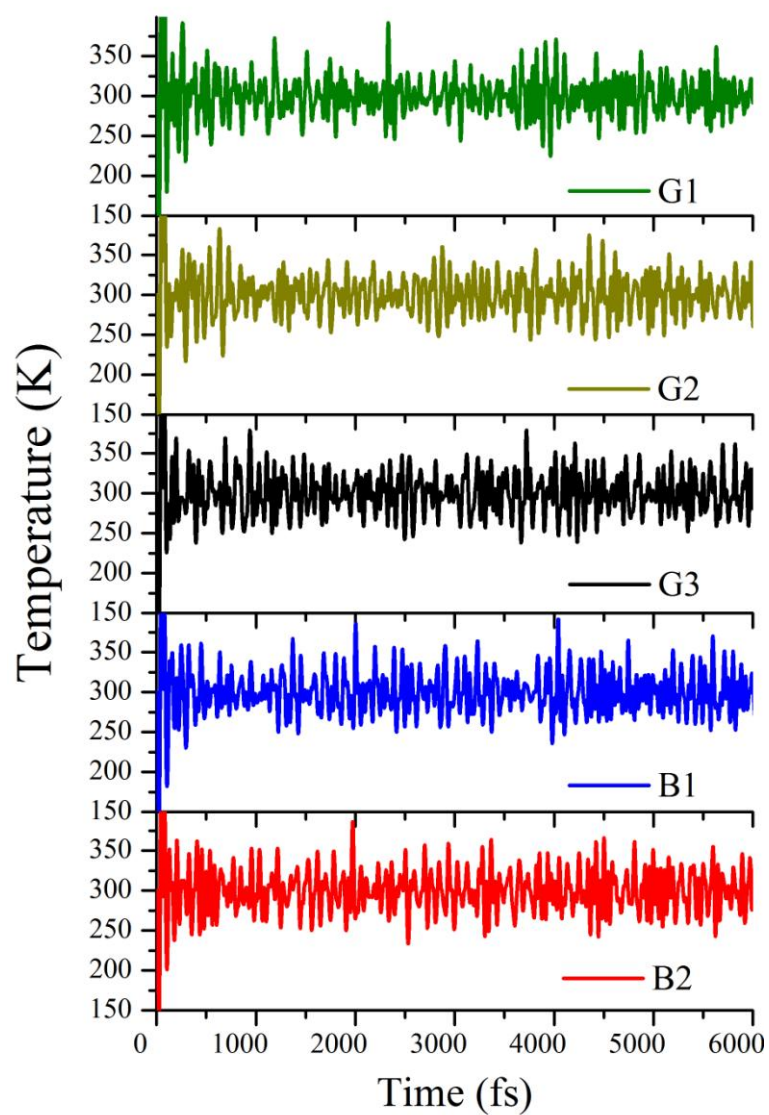

**Fig. S12.** The fluctuations of temperature of the five new allotropes in the process of BOMD simulation.

---

**Table S1.** Crystalline information of the bi-layered phosphorene allotropes from this work.

---

|                                                                                                |                                 |                                |
|------------------------------------------------------------------------------------------------|---------------------------------|--------------------------------|
| <b>System name:</b> G1 (this work)                                                             | <b>Space group:</b> Pbam No.55  |                                |
| <b>Lattice:</b> a=11.849;b=5.792;c=25.000; $\alpha$ =90.00; $\beta$ =90.00; $\gamma$ =90.00    |                                 |                                |
| P1:                                                                                            | 0.167                           | 0.506                          |
| P2:                                                                                            | 0.337                           | 0.379                          |
| P3:                                                                                            | 0.071                           | 0.369                          |
|                                                                                                |                                 |                                |
| <b>System name:</b> G2 (this work)                                                             | <b>Space group:</b> Pmc21 No.26 |                                |
| <b>Lattice:</b> a=25.000; b=12.144;c=5.532; $\alpha$ =90.00; $\beta$ =90.00; $\gamma$ =90.00   |                                 |                                |
| P1:                                                                                            | 0.455                           | 0.077                          |
| P2:                                                                                            | 0.431                           | 0.092                          |
| P3:                                                                                            | 0.500                           | 0.196                          |
| P4:                                                                                            | 0.500                           | 0.295                          |
| P5:                                                                                            | 0.431                           | 0.407                          |
| P6:                                                                                            | 0.454                           | 0.423                          |
|                                                                                                |                                 |                                |
| <b>System name:</b> G3 (this work)                                                             | <b>Space group:</b> Pbam No.55  |                                |
| <b>Lattice:</b> a= 12.281; b=5.533;c=25.00; $\alpha$ = 90.00; $\beta$ =90.00; $\gamma$ =90.00  |                                 |                                |
| P1:                                                                                            | 0.155                           | 0.686                          |
| P2:                                                                                            | 0.177                           | 0.075                          |
| P3:                                                                                            | 0.039                           | 0.681                          |
|                                                                                                |                                 |                                |
| <b>System name:</b> B1 (this work)                                                             | <b>Space group:</b> Pc No.7     |                                |
| <b>Lattice:</b> a=25.000;b=12.175; c=5.539; $\alpha$ =90.00; $\beta$ =85.604; $\gamma$ =90.00  |                                 |                                |
| P1:                                                                                            | 0.430                           | 0.081                          |
| P2:                                                                                            | 0.520                           | 0.076                          |
| P3:                                                                                            | 0.539                           | 0.095                          |
| P4:                                                                                            | 0.404                           | 0.085                          |
| P5:                                                                                            | 0.466                           | 0.199                          |
| P6:                                                                                            | 0.476                           | 0.306                          |
| P7:                                                                                            | 0.405                           | 0.407                          |
| P8:                                                                                            | 0.427                           | 0.423                          |
| P9:                                                                                            | 0.518                           | 0.422                          |
| P10:                                                                                           | 0.544                           | 0.412                          |
|                                                                                                |                                 |                                |
| <b>System name:</b> B2 (this work)                                                             | <b>Space group:</b> Pc No.7     |                                |
| <b>Lattice:</b> a= 25.00; b=12.287; c=5.442; $\alpha$ =90.00; $\beta$ =88.143; $\gamma$ =90.00 |                                 |                                |
| P1:                                                                                            | 0.490                           | 0.047                          |
| P2:                                                                                            | 0.430                           | 0.165                          |
| P3:                                                                                            | 0.565                           | 0.149                          |
| P4:                                                                                            | 0.457                           | 0.329                          |
| P5:                                                                                            | 0.547                           | 0.321                          |
|                                                                                                |                                 |                                |
| <b>System name:</b> $\eta$ -P (previous)                                                       | <b>Space group:</b> P-1 No.2    | (Nano. Lett., 17, 3557 (2015)) |
| <b>Lattice:</b> a=25.00; b=6.351; c=5.149; $\alpha$ =77.07; $\beta$ =89.78; $\gamma$ =90.86    |                                 |                                |
| P1:                                                                                            | 0.571                           | 0.685                          |
| P2:                                                                                            | 0.509                           | 0.905                          |
| P3:                                                                                            | 0.436                           | 0.688                          |
| P4:                                                                                            | 0.457                           | 0.352                          |
|                                                                                                |                                 |                                |
| <b>System name:</b> $\theta$ -P (previous)                                                     | <b>Space group:</b> Pm No.6     | (Nano. Lett., 17, 3557 (2015)) |
| <b>Lattice:</b> a=5.537; b=25.00; c=6.236; $\alpha$ =90.00; $\beta$ =76.59; $\gamma$ =90.00    |                                 |                                |
| P1:                                                                                            | 0.250                           | 0.500                          |
| P2:                                                                                            | 0.332                           | 0.569                          |
| P3:                                                                                            | 0.731                           | 0.546                          |
| P4:                                                                                            | 0.313                           | 0.545                          |
| P5:                                                                                            | 0.886                           | 0.500                          |
| P6:                                                                                            | 0.929                           | 0.569                          |

---

**Table S2.** Crystalline information for the single-layered 6-6 phosphorene allotropes

---

**System name:** blue-P,  $\beta$ -P, chair      **Space group:** P-3m1 No.164  
**Lattice:** a=3.269;b=3.269;c=25.000; $\alpha$ =90.00;  $\beta$ =90.00;  $\gamma$ =120.00  
P1: 0.667 0.333 0.524  
**References:** PRL 112, 176802 (2014)

**System name:** black-P,  $\alpha$ -P, stirrup      **Space group:** Pmna No.53  
**Lattice:** a= 3.306;b=25.000;c=4.509; $\alpha$ =90.00;  $\beta$ =90.00;  $\gamma$ =90.00  
P1: 0.500 0.543 0.916  
**References:** ACS nano., 8, 4033 (2014), Nat. Nano. 5, 372 (2014).

**System name:** red-P, tricycle      **Space group:** Pbcm No.57  
**Lattice:** a=25.000;b=8.989;c=3.294; $\alpha$ =90.00;  $\beta$ =90.00;  $\gamma$ =90.00  
P1: 0.576 0.166 0.250  
P2: 0.491 0.083 0.250  
**References:** J. Phys.:Condens.Matter. 27, 265301 (2015)

**System name:**  $\gamma$ -P, boat-1      **Space group:** Pmmn No.59  
**Lattice:** a=3.254;b=5.406;c=25.00; $\alpha$ =90.00;  $\beta$ =90.00;  $\gamma$ =90.00  
P1: 0.500 0.215 0.530  
**References:** PRL 113, 046804 (2014)

**System name:**  $\delta$ -P, boat-2      **Sace group:** Pbcm No.57  
**Lattice:** a=25.000;b=5.450;c=5.389; $\alpha$ =90.00;  $\beta$ =90.00;  $\gamma$ =90.00  
P1: 0.457 0.548 0.461  
**References:** PRL 113, 046804 (2014)

**System name:**  $\theta_0$ -P, twist-boat      **Space group:** Pcca No.54  
**Lattice:** a=5.779;b=25.000;c=6.129; $\alpha$ =90.00;  $\beta$ =90.00;  $\gamma$ =90.00  
P1: 0.602 0.531 0.908  
**References:** ACS nano., 8, 12763 (2014)

---

**Table S3.** Crystalline information for the single-layered 4-7 phosphorene allotropes

---

**System name:** New      **Space group:** P4bm No.100  
**Lattice:** a=7.011;b=7.011;c=25.000; $\alpha$ =90.00;  $\beta$ =90.00;  $\gamma$ =90.00  
P1: 0.115 0.385 0.569  
P2: 0.261 0.500 0.495  
**References:** this work

**System name:** New      **Space group:** P-421m No.113  
**Lattice:** a=7.585;b=7.585;c=25.00; $\alpha$ =90.00;  $\beta$ =90.00;  $\gamma$ =90.00  
P1: 0.029 0.189 0.481  
P2: 0.106 0.394 0.541  
**References:** this work

**System name:** New      **Space group:** P21/c No.14  
**Lattice:** a=25.000;b=7.594;c=7.484; $\alpha$ =90.00;  $\beta$ =90.00;  $\gamma$ =90.00  
P1: 0.524 0.099 0.921  
P2: 0.465 0.322 0.947  
P3: 0.525 0.499 0.811  
**References:** this work

---



**Table S4.** Crystalline information for the single-layered 3-12 phosphorene allotropes

---

**System name:** New **Space group:** Pmmn No.59

**Lattice:** a=10.096;b=5.481;c=25.000; $\alpha=90.00$ ;  $\beta=90.00$ ;  $\gamma=90.00$

P1: 0.896 0.500 0.441

P2: 0.844 0.296 0.514

**References:** this work

**System name:** New **Space group:** Cmm2 No.35

**Lattice:** a=10.702;b=5.371;c=25.000; $\alpha=90.00$ ;  $\beta=90.00$ ;  $\gamma=90.00$

P1: 0.147 0.289 0.339

P2: 0.109 0.500 0.265

**References:** this work

**System name:** Kagome; 3-12 (N=2) **Space group:** P-3M1 No.164

**Lattice:** a=5.468;b=5.468;c=25.000; $\alpha=90.00$ ;  $\beta=90.00$ ;  $\gamma=120.00$

P1: 0.529 0.471 0.543

**References:** ACS nano., 8, 12763 (2014);J. Phys.: Condens. Matter. 27, 255006 (2015);

---

**Table S5.** Crystalline information for the single-layered 4-8 phosphorene allotropes

---

**System name:** New **Space group:** P4/nmm No.129

**Lattice:** a=5.475;b=5.475;c=25.000; $\alpha=90.00$ ;  $\beta=90.00$ ;  $\gamma=90.00$

P1: 0.211 0.289 0.543

**References:** this work

**System name:** 4-8 (N=0) **Space group:** P4/nbm No.125

**Lattice:** a=6.457;b=6.457;c=25.000; $\alpha=90.00$ ;  $\beta=90.00$ ;  $\gamma=90.00$

P1: 0.147 0.353 0.475

**References:** ACS nano., 8, 12763 (2014)

**System name:** New **Space group:** P-4m2 No.115

**Lattice:** a=4.889;b=4.889;c=25.000; $\alpha=90.00$ ;  $\beta=90.00$ ;  $\gamma=120.00$

P1: 0.500 0.245 0.528

**References:** This work

**System name:**  $\epsilon$ -P **Space group:** P4212 No.90

**Lattice:** a=5.371;b=5.371;c=25.000; $\alpha=90.00$ ;  $\beta=90.00$ ;  $\gamma=90.00$

P1: 0.257 0.341 0.543

**References:** Nano. Lett., 17, 3557 (2015)

**System name:**  $\zeta$ -P **Space group:** P-1 No.2

**Lattice:** a=6.452;b=5.325;c=25.000; $\alpha=90.00$ ;  $\beta=90.00$ ;  $\gamma=90.00$

P1: 0.084 0.264 0.488

P2: 0.341 0.369 0.544

P3: 0.584 0.232 0.487

P4: 0.840 0.143 0.544

**References:** Nano. Lett., 17, 3557 (2015)

---

**Table S6.** Crystalline information for the single-layered 5-7 phosphorene allotropes

---

**System name:** 5-7 (N=2)                      **Space group:** P2 No.3  
**Lattice:** a=5.423;b=25.00;c=6.258; $\alpha$ =90.00;  $\beta$ =75.00;  $\gamma$ =90.00  
P1: 0.137 0.519 0.597  
P2: 0.296 0.437 0.619  
P3: 0.298 0.445 0.991  
**References:** ACS nano., 8, 12763 (2014)

**System name:** New                              **Space group:** P-1 No.2  
**Lattice:** a= 6.297;b=25.00;c=6.205; $\alpha$ =90.00;  $\beta$ =76.44;  $\gamma$ =90.00  
P1: 0.076 0.525 0.614  
P2: 0.368 0.471 0.591  
P3: 0.381 0.468 0.966  
P4: 0.899 0.478 0.904  
**References:** this work

**System name:** New                              **Space group:** P-1 No.2  
**Lattice:** a=5.466;b=25.00;c=6.232; $\alpha$ = 90.00;  $\beta$ =74.94;  $\gamma$ =90.00  
P1: 0.000 0.527 0.361  
P2: 0.423 0.459 0.582  
P3: 0.446 0.459 0.947  
P4: 0.974 0.535 0.898  
**References:** This work

**System name:** New                              **Space group:** P21/C No.14  
**Lattice:** a=25.00;b=6.186;c=10.51; $\alpha$ =90.00;  $\beta$ =90.27;  $\gamma$ =90.00  
P1: 0.472 0.137 0.004  
P2: 0.534 0.389 0.016  
P3: 0.541 0.452 0.226  
P4: 0.541 0.826 0.210  
**References:** This work

**System name:** New                              **Sace group:** Pba2 No.32  
**Lattice:** a=6.228;b=10.138;c=25.00; $\alpha$ =90.00;  $\beta$ =90.00;  $\gamma$ =90.00  
P1: 0.135 0.932 0.610  
P2: 0.194 0.855 0.527  
P3: 0.567 0.852 0.535  
P4: 0.616 0.917 0.621  
**References:** This work

**System name:** New                              **Space group:** P21 No.4  
**Lattice:** a=6.192;b=10.242;c=25.00; $\alpha$ =90.00;  $\beta$ =90.06;  $\gamma$ =90.00  
P1: 0.296 0.758 0.433  
P2: 0.427 0.724 0.517  
P3: 0.799 0.739 0.517  
P4: 0.917 0.778 0.432  
**References:** This work

---

**Table S7.** Crystalline information for the single-layered 5-8 phosphorene allotropes

---

**System name:** New **Space group:** P2221 No.17**Lattice:** a=25.00;b=4.679;c=9.487; $\alpha=90.00$ ;  $\beta=90.00$ ;  $\gamma=90.00$ 

P1: 0.410 0.074 0.112

P2: 0.477 0.388 0.102

P3: 0.453 0.742 0.248

**References:** This work**System name:** New **Space group:** P2221 No.17**Lattice:** a=25.00;b=4.762;c=11.618; $\alpha=90.00$ ;  $\beta=90.00$ ;  $\gamma=90.00$ 

P1: 0.439 0.100 0.085

P2: 0.507 0.409 0.088

P3: 0.462 0.727 0.194

**References:** This work**System name:** New **Space group:** Pma2 No.28**Lattice:** a=9.206;b=5.841;c=25.00; $\alpha=90.00$ ;  $\beta=90.00$ ;  $\gamma=90.00$ 

P1: 0.046 0.179 0.514

P2: 0.250 0.176 0.463

P3: 0.250 0.549 0.486

P4: 0.056 0.672 0.439

**References:** This work**System name:** New **Space group:** P2 No.3**Lattice:** a=3.254;b=5.406;c=25.00; $\alpha=90.00$ ;  $\beta=72.68$ ;  $\gamma=90.00$ 

P1: 0.156 0.533 0.825

P2: 0.169 0.459 0.520

P3: 0.336 0.521 0.149

**References:** This work**System name:** 5-8 (N=2) **Space group:** P21/m No.11**Lattice:** a=5.479;b=9.097;c=25.00; $\alpha=90.00$ ;  $\beta=91.45$ ;  $\gamma=90.00$ 

P1: 0.463 0.984 0.543

P2: 0.616 0.750 0.556

P3: 0.750 0.750 0.472

P4: 0.940 0.965 0.459

**References:** ACS nano., 8, 12763 (2014)
